# Supplementary material for: Study-Related Work and Commuting Accidents among Students at the University of Mainz from 12/2012 to 12/2018: Identification of Potential Risk Groups and Implications for Prevention
Source: Int J Environ Res Public Health. 2020 May 23;17(10):3676. doi: 10.3390/ijerph17103676 (PMC7277531; doi:10.3390/ijerph17103676)
Supplement: Supplementary file 1 [file ijerph-17-03676-s001.pdf]

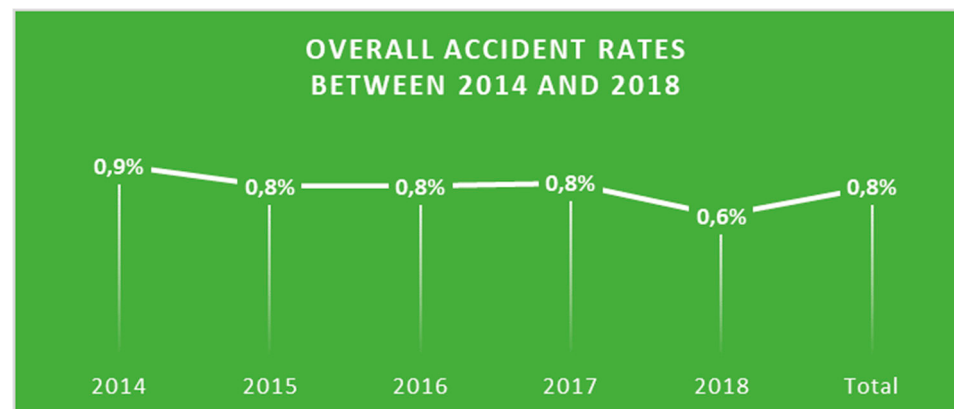

**Figure S1.** Overall Accident Rates Between 2014 and 2018.

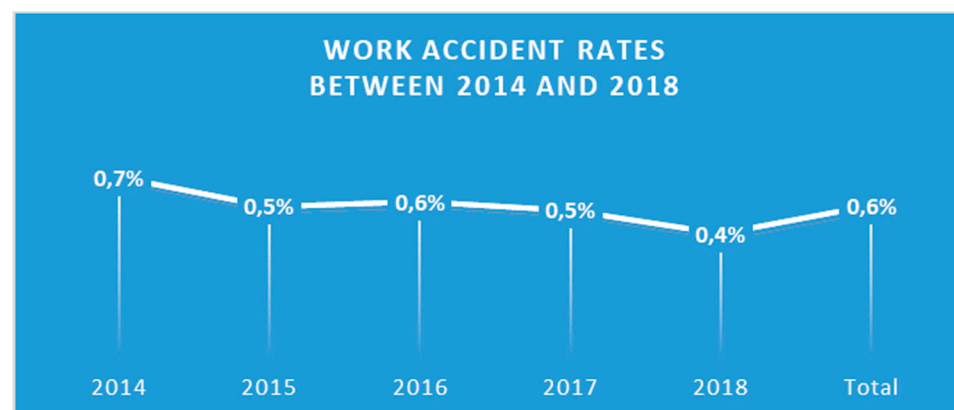

**Figure S2.** Work Accident Rates Between 2014 and 2018.

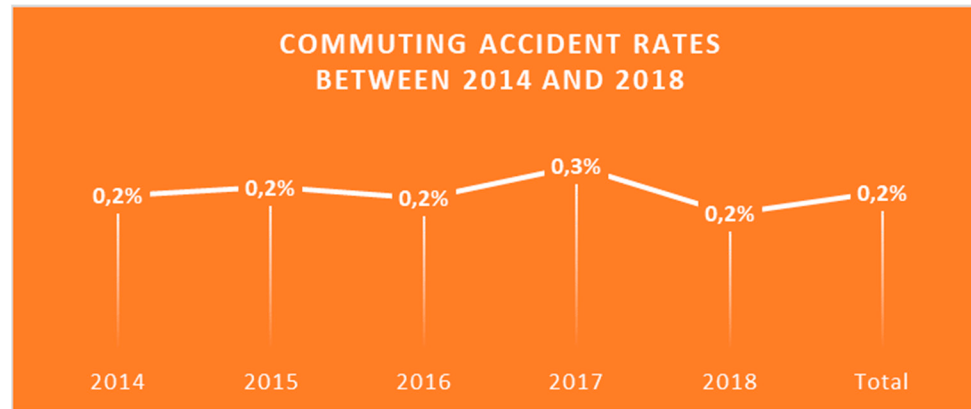

**Figure 3.** Commuting Accident Rates Between 2014 and 2018.

**Table S1.** Description of the basic population according to the annually published Data and Statistics Report of the JGU: total number of registered students at the JGU per faculty/school (N) and percentage of female students in the winter terms 2010/11 until 2018/19.

|                                                                         | Winter term<br>2012/13 | Winter term<br>2013/14 | Winter term<br>2014/15 | Winter term<br>2015/16 | Winter term<br>2016/17 | Winter term<br>2017/18 | Winter term<br>2018/19 |
|-------------------------------------------------------------------------|------------------------|------------------------|------------------------|------------------------|------------------------|------------------------|------------------------|
| Faculty / School                                                        | N (%)<br>females)      |
| F 01 – Catholic and Evangelic Theology                                  | 581 (49)               | 545 (52)               | 495 (55)               | 466 (55)               | 465 (55)               | 411 (55)               | 340 (54)               |
| F 02 – Social Sciences, Media and Sport                                 | 5,929 (61)             | 5,776 (63)             | 5,596 (64)             | 5,125 (65)             | 5,000 (66)             | 5,053 (65)             | 5,096 (64)             |
| F 03 – Law and Economic Sciences                                        | 5,730 (51)             | 5,686 (51)             | 5,761 51               | 5,755 (52)             | 5,778 (52)             | 6,058 (53)             | 6,006 (53)             |
| F 04 – Medicine                                                         | 3,510 (62)             | 3,542 (62)             | 3,524 (63)             | 3,616 (62)             | 3,721 (62)             | 3,832 (63)             | 3,885 (63)             |
| F 05 – Philosophy and Philology                                         | 7,108 (72)             | 6,930 (71)             | 6,416 (71)             | 5,760 (73)             | 5,770 (73)             | 5,705 (72)             | 5,672 (72)             |
| F 06 – Translation, Linguistic and Cultural<br>Sciences                 | 1,868 (79)             | 1,798 (80)             | 1,732 (80)             | 1,636 (78)             | 1,587 (79)             | 1,490 (80)             | 1,383 (80)             |
| F 07 – History and Culture Sciences                                     | 2,875 (56)             | 2,845 (57)             | 2,593 (57)             | 2,212 (57)             | 2,063 (58)             | 1,935 (58)             | 1,837 (57)             |
| F 08 – Physics, Mathematics and<br>Computer Sciences                    | 2,518 (33)             | 2,519 (31)             | 2,530 (31)             | 2,526 (31)             | 2,408 (29)             | 2,362 (30)             | 2,367 (30)             |
| F 09 – Chemistry, Pharmaceutical<br>Sciences, Geography and Geosciences | 3,838 (46)             | 3,897 (46)             | 3,817 (47)             | 3,738 (48)             | 3,557 (48)             | 3,424 (48)             | 3,085 (49)             |
| F 10 – Biology                                                          | 1,830 (63)             | 1,805 (62)             | 1,725 (63)             | 1,649 (63)             | 1,549 (65)             | 1,497 (66)             | 1,493 (65)             |
| School of Music Mainz                                                   | 339 (52)               | 357 (52)               | 350 (53)               | 344 (52)               | 353 (52)               | 323 (52)               | 338 (52)               |
| School of Art Mainz                                                     | 147 (73)               | 159 (74)               | 154 (73)               | 143 (76)               | 149 (79)               | 134 (81)               | 138 (75)               |
| International Preparatory and Language<br>Center                        | 167 (61)               | 169 (73)               | 258 (65)               | 162 (65)               | 267 (55)               | 302 (53)               | 327 (51)               |
| Total                                                                   | 36,440 (59)            | 36,028 (59)            | 34,951 (59)            | 33,132 (59)            | 32,667 (59)            | 32,526 (59)            | 31,967 (59)            |

F, faculty; JGU, Johannes Gutenberg University. The *International Preparatory and Language Center* exists since October 2012. It is a fusion of the formerly separate central institutions *Language Center* and *Preparatory College*.

**Table S2.** Specific types of and reasons for study-related commuting ( $N = 363$ ) and work accidents ( $N = 922$ ).

|                                                    | <i>N (percentage)</i> | <i>Reason for accident</i>                      | <i>N (percentage)</i> |
|----------------------------------------------------|-----------------------|-------------------------------------------------|-----------------------|
| <i>Commuting accidents</i>                         |                       |                                                 |                       |
| Injured by fall                                    | 199 (54.8%)           | Fell/tripped over something                     | 101 (50.1)            |
|                                                    |                       | Twisted one's ankle                             | 56 (28.1)             |
|                                                    |                       | Slipped down                                    | 39 (19.6)             |
|                                                    |                       | Others                                          | 3 (1.5)               |
| Injured by bump/hit                                | 149 (41.0%)           | Collided with someone/something                 | 118 (79.2)            |
|                                                    |                       | Banged on something                             | 24 (16.1)             |
|                                                    |                       | Others                                          | 7 (4.8)               |
| Others                                             | 9 (2.5%)              | ---                                             | ---                   |
| Not reported                                       | 6 (1.7%)              | ---                                             | ---                   |
| <i>Work accidents</i>                              |                       |                                                 |                       |
| Injured by fall                                    | 344 (37.3%)           | Twisted one's ankle                             | 171 (49.7)            |
|                                                    |                       | Fell/tripped over something                     | 81 (23.5)             |
|                                                    |                       | Miscarried rotation                             | 53 (15.4)             |
|                                                    |                       | Slipped down                                    | 25 (7.3)              |
|                                                    |                       | Others                                          | 14 (4.0)              |
| Injured by bump/hit                                | 206 (22.3%)           | Hit by something                                | 97 (47.1)             |
|                                                    |                       | Banged on something                             | 50 (24.3)             |
|                                                    |                       | Collided with someone/something                 | 49 (23.8)             |
|                                                    |                       | Others                                          | 10 (4.9)              |
| Injured by mechanical impact                       | 204 (22.1%)           | Pricked oneself on something/pricked by someone | 120 (58.8)            |
|                                                    |                       | Cut oneself with/on something                   | 58 (28.4)             |
|                                                    |                       | Others                                          | 26 (12.8)             |
| Injured by physical, chemical or biological impact | 75 (8.1%)             | Injured by hazardous substance                  | 55 (73.3)             |
|                                                    |                       | Burned/scalded oneself on something             | 12 (16.0)             |
|                                                    |                       | Others                                          | 8 (10.7)              |
| Others                                             | 33 (3.6%)             | ---                                             | ---                   |
| Not reported                                       | 60 (6.5%)             | ---                                             | ---                   |
